# Supplementary material for: Validity of Sealant Retention as Surrogate for Caries Prevention – A Systematic Review
Source: PLoS One. 2013 Oct 23;8(10):e77103. doi: 10.1371/journal.pone.0077103 (PMC3806731; doi:10.1371/journal.pone.0077103)
Supplement: File S1 — References, extracted data and information from accepted trials. (XLS) [file pone.0077103.s001.xls]

## Sheet: Sheet1
Study	Reference					Study		Data	Study		Material		"Total retention" lost		Site specific			Caries present							RCR Ratio		Datasets excluded with reason					Total DS	Total
1st Author	Journal	Year	Volume	1st Page	Source	Included	Excluded	calc.	design	R+G	type	Period	nR	N	data	R-R	ln(R-R)	D	DF	DMF	nC	N	R-C	ln(R-C)	Exact	Rounded	1	2	3	4	5	excluded	DS
Amin	J Dent Hyg	2008	82	45	1			1	RCT	1	1	24	5	26		0.19	-1.66073	1			1	26	0.04	-3.21888	4.75	4.75							1
Amin	J Dent Hyg	2008	82	45	1	1		1	RCT	1	1	24	4	28		0.14	-1.96611	1			1	28	0.04	-3.21888	3.5	3.5							1
Antonson	J Am Dent Assoc	2012	143	115	4		1	2	SM	1																					1		1
Arrow	Community Dent Oral Epidemiol	1995	23	282	1	1		1	SM	1	1	48	292	405		0.72	-0.328504	1			31	405	0.08	-2.52573	9	9							1
Barrie	Community Dent Health	1990	7	273	1																							1					1
Barrie	Community Dent Health	1990	7	273	1																							1					1
Barrie	Community Dent Health	1990	7	273	1																							1					1
Barrie	Community Dent Health	1990	7	273	1		1																					1					1
Barja-Fidalgo	J Dent Child	2009	76	34	1	1		1	RCT	1	1	60	22	28		0.78	-0.248461		1		7	28	0.25	-1.38629	3.12	3.12							1
Baseggio	Oral Health Prev Dent	2010	8	261	1			1	SM	1	1	24	40	640		0.06	-2.81341	1			20	640	0.03	-3.50656	2	2							1
Baseggio	Oral Health Prev Dent	2010	8	261	1			1	SM	1	1	36	56	628		0.08	-2.52573	1			56	628	0.09	-2.40795	0.888889	0.89							1
Baseggio	Oral Health Prev Dent	2010	8	261	1	1		2	SM	1	1	30	44	636		0.07	-2.65926	1			62	636	0.1	-2.30259	0.7	0.7							1
Beiruti	Am J Dent	2006	19	159	1		1	1																						1			1
Beiruti	Caries Res	2006	40	52	1		1	2	RCT	1																					1		1
Bendinskaite	Stomatologija	2010	12	87	1			1	RCT		1	24	4	109		0.04	-3.21888		1		0.5	109	0.005	-5.29832	8	8							1
Bendinskaite	Stomatologija	2010	12	87	1	1		1	RCT		1	60	58	93		0.62	-0.478036		1		5	93	0.05	-2.99573	12.4	12.4							1
Bojanini	J Prev Dent	1976	3	31	4	1		2	SM		1	36	5	21		0.24	-1.42712	1			4	21	0.19	-1.66073	1.26316	1.26							1
Brooks	J Am Dent Assoc	1979	98	722	1			1	SM		1	24	108	258		0.42	-0.867501		1		51	258	0.2	-1.60944	2.1	2.1							1
Brooks	J Am Dent Assoc	1979	99	42	1			1	SM		1	36	70	168		0.42	-0.867501		1		49	168	0.29	-1.23787	1.44828	1.45							1
Brooks	J Am Dent Assoc	1979	98	722	1			1	SM		1	24	37	233		0.16	-1.83258		1		25	233	0.11	-2.20727	1.45455	1.45							1
Brooks	J Am Dent Assoc	1979	99	42	1	1		1	SM		1	36	26	165		0.16	-1.83258		1		27	165	0.16	-1.83258	1	1							1
Brooks	Clin Prev Dent	1988	10	18	1																							1					1
Brooks	Clin Prev Dent	1988	10	18	1																							1					1
Brooks	Clin Prev Dent	1988	10	18	1		1																					1					1
Buonocore	J Am Dent Assoc	1971	82	1090	1		1																				1						1
Carlsson	Am J Dent	1997	10	115	1		1																					1					1
Charbeneau	J Am Dent Assoc	1979	98	559	1			1	SM		1	24	54	186		0.29	-1.23787	1			33	186	0.18	-1.7148	1.61111	1.61							1
Charbeneau	J Am Dent Assoc	1979	98	559	1			1	SM		1	36	76	193		0.39	-0.941609	1			52	193	0.27	-1.30933	1.44444	1.44							1
Charbeneau	J Am Dent Assoc	1979	98	559	1	1		1	SM		1	48	88	185		0.48	-0.733969	1			67	185	0.36	-1.02165	1.33333	1.33							1
Cline	Community Dent Oral Epidemiol	1979	7	206	1			2	LS		1	48	245	324		0.76	-0.274437	1			128	324	0.4	-0.916291	1.9	1.9							1
Cline	Community Dent Oral Epidemiol	1979	7	206	1			2	LS		1	24	124	177		0.7	-0.356675	1			69	177	0.39	-0.941609	1.79487	1.8							1
Cline	Community Dent Oral Epidemiol	1979	7	206	1	1		2	LS		1	36	214	289		0.74	-0.301105	1			134	289	0.46	-0.776529	1.6087	1.61							1
De Craene	J Dent Child	1989	56	97	1		1																				1						1
Dhar	Pediatr Dent	2012	34	46	4	1		2	SM	1	1	24	25	25		1	0	1			3	25	0.12	-2.12026	8.33333	8.33							1
Dukic	Eur Arch Paediatr Dent	2007	8	163	1			1	CT		1	24	13	33		0.39	-0.941609	1			1	33	0.03	-3.50656	13	13							1
Dukic	Eur Arch Paediatr Dent	2007	8	163	1			1	CT		1	24	8	34		0.24	-1.42712	1			0.5	34	0.01	-4.60517	24	24							1
Dukic	Eur Arch Paediatr Dent	2007	8	163	1	1		2	CT		1	24	11	33		0.33	-1.10866	1			2	33	0.06	-2.81341	1.70475	1.71							1
Forss	Community Dent Oral Epidemiol	1994	22	21	1																									1			1
Forss	Community Dent Oral Epidemiol	1994	22	21	1	1		1	SM	1	1	24	26	151		0.17	-1.77196	1			7	151	0.05	-2.99573	3.4	3.4							1
Forss	Community Dent Oral Epidemiol	1998	26	21	1																									1			1
Forss	Community Dent Oral Epidemiol	1998	26	21	1	1		1	SM	1	1	84	52	97		0.54	-0.616186	1			16	97	0.16	-1.83258	3.375	3.38							1
Gandini	J Dent Child	1991	58	297	1																							1					1
Gandini	J Dent Child	1991	58	297	1																							1					1
Gandini	J Dent Child	1991	58	297	1		1																					1					1
Ganesh	J Clin Pediatr Dent	2006	31	52	1		1																					1					1
Going	J Am Dent Assoc	1976	92	388	1		1																					1					1
Going	J Am Dent Assoc	1977	95	972	1	1		1	SM		1	48	103	144		0.72	-0.328504	1			85	144	0.59	-0.527633	1.22034	1.22							1
Gourly	J Publ Health Dent	1975	35	132	1		1	1																							1		1
Hardison	Comp Cont Edu Dent	1985	6	229	1		1																						1				1
Higson	J Dent	1976	4	218	1	1		1	SM		1	24	87	90		0.28	-1.27297	1			37	90	0.41	-0.891598	0.682927	0.68							1
Holst	Swed Dent J	1998	22	195	1																								1				1
Holst	Swed Dent J	1998	22	195	1																								1				1
Holst	Swed Dent J	1998	22	195	1																								1				1
Holst	Swed Dent J	1998	22	195	1		1																						1				1
Horowitz	J Am Dent Assoc	1974	89	885	1		1																				1						1
Horowitz	J Prev Dent	1976	3	38	1		1																						1				1
Horowitz	J Am Dent Assoc	1977	95	1133	1		1																				1						1
Houpt	Pediatr Dent	1983	5	104	1																								1				1
Houpt	Pediatr Dent	1983	5	104	1																								1				1
Houpt	Pediatr Dent	1983	5	104	1																								1				1
Houpt	Pediatr Dent	1983	5	104	1		1																						1				1
Houpt	J Am Dent Assoc	1987	115	55	1			1	RCT/CT		1	36	32	110		0.29	-1.23787	1			16	110	0.14	-1.96611	2.07143	2.07							1
Houpt	J Am Dent Assoc	1987	115	55	1	1		1	RCT/CT		1	36	36	114		0.32	-1.13943	1			20	114	0.18	-1.7148	1.77778	1.78							1
Kargul	Eur Arch Paediatr Dent	2009	10	218	1			1	SM		1	24	29	54		0.53	-0.634878	1			7	54	0.13	-2.04022	4.07692	4.08							1
Kargul	Eur Arch Paediatr Dent	2009	10	218	1			1	SM		1	36	32	46		0.7	-0.356675	1			9	46	0.2	-1.60944	3.5	3.5							1
Kargul	Eur Arch Paediatr Dent	2009	10	218	1			1	SM		1	24	43	53		0.81	-0.210721	1			5	53	0.09	-2.40795	9	9							1
Kargul	Eur Arch Paediatr Dent	2009	10	218	1	1		1	SM		1	36	41	46		0.89	-0.116534	1			6	46	0.13	-2.04022	6.84615	6.85							1
Karlzen-Reuterving	J Dent Child	1995	62	108	1																							1					1
Karlzen-Reuterving	J Dent Child	1995	62	108	1	1		1	SM	1	1	36	15	72	1	0.21	-1.56065	1			3	72	0.04	-3.21888	5.25	5.25							1
Kervanto-Seppälä	Int J Paediatr Dent	2008	18	56	1		1	1	SM	1																					1		1
Kilpatrick	J Dent	1996	24	399	3		1																				1						1
Lampa	J Dent Child	2004	71	152	1	1		1	SM		1	24	34	100		0.34	-1.07881	1			9	100	0.09	-2.40795	3.77778	3.78							1
Li	Community Dent Oral Epidemiol	1981	9	151	1			1	SM		1	24	82	262		0.31	-1.17118	1			57	262	0.22	-1.51413	1.40909	1.41							1
Li	Community Dent Oral Epidemiol	1981	9	151	1	1		1	SM		1	24	33	262		0.13	-2.04022	1			29	262	0.11	-2.20727	1.18182	1.18							1
Little	Dent Hyg Chic	1986	60	62	1																								1				1
Little	Dent Hyg Chic	1986	60	62	1																								1				1
Little	Dent Hyg Chic	1986	60	62	1		1																						1				1
Lygidakis	Pediatr Dent	1999	21	429	1			1	SM		1	48	38	162		0.23	-1.46968	1			14	162	0.09	-2.40795	2.55556	2.56							1
Lygidakis	Pediatr Dent	1999	21	429	1	1		1	SM		1	48	18	162		0.11	-2.20727	1			19	162	0.12	-2.12026	0.916666	0.92							1
McCune	J Am Dent Assoc	1979	99	619	1			1	SM		1	24	28	252		0.11	-2.20727	1			7	252	0.03	-3.50656	3.66667	3.67							1
McCune	J Am Dent Assoc	1979	99	619	1	1		1	SM		1	36	34	272		0.12	-2.12026	1			22	272	0.08	-2.52573	1.5	1.5							1
Mejare	Scand J Dent Res	1990	98	345	2																						1						1
Mejare	Scand J Dent Res	1990	98	345	2		1																				1						1
MertzFairhurst	J Am Dent Assoc	1981	103	235	1			1	SM		1	48	115	177		0.65	-0.430783	1			97	177	0.55	-0.597837	1.18182	1.18							1
Mertz-Fairhurst	J Am Dent Assoc	1981	103	235	1	1		1	SM																						1		1
MertzFairhurst	J Am Dent Assoc	1982	105	237	1																							1					1
Mertz-Fairhurst	J Am Dent Assoc	1982	105	237	1		1																					1					1
MertzFairhurst	J Am Dent Assoc	1984	109	252	1			1	SM		1	84	82	119		0.69	-0.371064	1			78	119	0.66	-0.415515	1.04545	1.05							1
Mertz-Fairhurst	J Am Dent Assoc	1984	109	252	1	1		1	SM		1	84	35	102		0.34	-1.07881	1			32	102	0.31	-1.17118	1.09677	1.1							1
Messer	J Dent Child	1980	47	175	1			1	CT		1	24	124	177		0.7	-0.356675		1		69	177	0.39	-0.941609	1.79487	1.8							1
Messer	J Dent Child	1980	47	175	1	1		1	CT		1	36	184	289		0.64	-0.446287		1		134	289	0.46	-0.776529	1.3913	1.39							1
Messer	Austr Dent J	1997	42	233	1		1																				1						1
Meurman	Scand J Dent Res	1976	84	218	1	1		2	CT		1	36	37	166		0.22	-1.51413	1			14	166	0.08	-2.52573	2.75	2.75							1
Mills	Oper Dent	1993	18	148	1	1		1	SM	1	1	24	25	59		0.42	-0.867501	1			0.5	59	0.008	-4.82831	52.5	52.5							1
Mladenovic	SciJFacMedNis	2010	27	115	4	1		2	SM	1	1	24	8	36		0.22	-1.51413	1			4	36	0.11	-2.20727	2	2							1
Nazar	Med Princ Pract	2013	22	12	4	1		2	SM		1	60	180	240		0.75	-0.287682	1			119	240	0.5	-0.693147	1.5	1.5							1
Oba	J Formosa Med Assoc	2009	108	844	1	1		1	SM	1	1	36	81	81		1	0	1			8	81	0.1	-2.30259	10	10							1
Pardi	J Clin Pediatr Dent	2005	29	133	1		1	1	RCT	1																					1		1
Poulsen	Community Dent Oral Epidemiol	2001	29	298	1																							1					1
Poulsen	Community Dent Oral Epidemiol	2001	29	298	1	1		1	SM	1	1	36	30	116		0.26	-1.34707	1			13	116	0.11	-2.20727	2.36364	2.36							1
Poulsen	Community Dent Oral Epidemiol	2006	34	36	1	1		1	SM	1	1	29	135	364		0.37	-0.994252	1			22	364	0.06	-2.81341	6.16667	6.17							1
Puppin-Rontani	J Dent Child	2006	73	31	1	1		1	SM		1	24	40	50		0.8	-0.223144	1			0.5	50	0.01	-4.60517	80	80							1
Raadal	Int J Paediatr Dent	1991	2	77	1			1			1	24	3	117	1	0.03	-3.50656	1			0.5	117	0.004	-5.52146	7.5	7.5							1
Raadal	Int J Paediatr Dent	1991	2	77	1	1		1			1	24	3	117	1	0.03	-3.50656	1			0.5	117	0.004	-5.52146	7.5	7.5							1
Raadal	Int J Paediatr Dent	1996	6	235	1			1	SM	1	1	24	0.5	136		0.004	-5.52146	1			0.5	136	0.004	-5.52146	1	1							1
Raadal	Int J Paediatr Dent	1996	6	235	1	1		1	SM	1	1	36	4	136		0.03	-3.50656	1			0.5	136	0.004	-5.52146	7.5	7.5							1
Richardson	J Can Dent Assoc	1978	44	269	1	1		1	SM		1	24	50	352		0.14	-1.96611	1			26	352	0.07	-2.65926	2	2							1
Richardson	J Can Dent Assoc	1980	46	259	1	1		1	SM		1	36	85	337		0.25	-1.38629	1			58	337	0.17	-1.77196	1.47059	1.47							1
Richardson	Pediatr Dent	1980	2	24	1		1																						1				1
Rock	Brit Dent J	1974	136	317	1			2	SM		1	24	17	34		0.5	-0.693147	1			2	34	0.06	-2.81341	8.3333	8.33							1
Rock	Brit Dent J	1974	136	317	1			2	SM		1	24	19	23		0.83	-0.18633	1			12	23	0.52	-0.653926	1.59615	1.6							1
Rock	Brit Dent J	1974	136	317	1			2	SM		1	24	32	178		0.18	-1.7148	1			4	178	0.02	-3.91202	9	9							1
Rock	Brit Dent J	1974	136	317	1			2	SM		1	24	130	130		1	0	1			32	130	0.25	-1.38629	4	4							1
Rock	Brit Dent J	1974	136	317	1	1		2	SM		1	24	166	166		1	0	1			32	166	0.19	-1.66073	5.26316	5.26							1
Rock	Community Dent Oral Epidemiol	1981	9	207	1																							1					1
Rock	Community Dent Oral Epidemiol	1981	9	207	1	1		1	SM		1	36	182	307		0.59	-0.527633	1			63	307	0.21	-1.56065	2.80952	2.81							1
Rock	Brit Dent J	1983	155	344	1			1			1	36	73	164		0.44	-0.820981		1		4	164	0.002	-6.21461	220	220							1
Rock	Brit Dent J	1983	155	344	1	1		1			1	36	94	164		0.57	-0.562119		1		16	164	0.1	-2.30259	5.7	5.7							1
Rock	Brit Dent J	1990	168	323	1			1	SM		1	24	56	298		0.19	-1.66073	1			0.5	298	0.002	-6.21461	95	95							1
Rock	Brit Dent J	1990	168	323	1			1	SM		1	36	73	318		0.23	-1.46968	1			13	318	0.04	-3.21888	5.75	5.75							1
Rock	Brit Dent J	1990	168	323	1			1	SM		1	24	23	140		0.16	-1.83258	1			0.5	140	0.004	-5.52146	40	40							1
Rock	Brit Dent J	1990	168	323	1			1	SM		1	36	27	158		0.17	-1.77196	1			6	158	0.04	-3.21888	4.25	4.25							1
Rock	Brit Dent J	1990	168	323	1			1	SM		1	24	33	158		0.21	-1.56065	1			0.5	158	0.003	-5.80914	70	70							1
Rock	Brit Dent J	1990	168	323	1	1		1	SM		1	36	45	160		0.28	-1.27297	1			0.5	160	0.003	-5.80914	93.3333	93.33							1
Rock	J Dent	1996	24	275	1			1	SM	1	1	24	40	132		0.3	-1.20397	1			2	132	0.02	-3.91202	15	15							1
Rock	J Dent	1996	24	275	1	1		1	SM	1																					1		1
Romcke	J Can Dent Assoc	1990	56	235	1			1	LS		1	24	926	4849		0.19	-1.66073		1		107	4849	0.02	-3.91202	9.5	9.5							1
Romcke	J Can Dent Assoc	1990	56	235	1			1	LS		1	36	908	3548		0.26	-1.34707		1		114	3548	0.03	-3.50656	8.66667	8.67							1
Romcke	J Can Dent Assoc	1990	56	235	1			1	LS		1	48	850	2665		0.32	-1.13943		1		99	2665	0.04	-3.21888	8	8							1
Romcke	J Can Dent Assoc	1990	56	235	1			1	LS		1	60	686	1972		0.35	-1.04982		1		71	1972	0.04	-3.21888	8.75	8.75							1
Romcke	J Can Dent Assoc	1990	56	235	1			1	LS		1	72	432	1232		0.35	-1.04982		1		48	1232	0.04	-3.21888	8.75	8.75							1
Romcke	J Can Dent Assoc	1990	56	235	1			1	LS		1	84	360	984		0.37	-0.994252		1		36	984	0.04	-3.21888	9.25	9.25							1
Romcke	J Can Dent Assoc	1990	56	235	1			1	LS		1	96	326	798		0.41	-0.891598		1		32	798	0.04	-3.21888	10.25	10.25							1
Romcke	J Can Dent Assoc	1990	56	235	1			1	LS		1	108	182	431		0.42	-0.867501		1		19	431	0.04	-3.21888	10.5	10.5							1
Romcke	J Can Dent Assoc	1990	56	235	1	1		1	LS		1	120	39	66		0.59	-0.527633		1		3	66	0.04	-3.21888	14.75	14.75							1
Sheykholeslam	Community Dent Oral Epidemiol	1978	6	181	1	1		2	SM		1	24	27	175		0.15	-1.89712	1			11	175	0.06	-2.81341	2.5	2.5							1
Shapira	Pediatr Dent	1990	12	168	1			1																				1					1
Shapira	Pediatr Dent	1990	12	168	1			1	SM		1	60	32	81	1	0.4	-0.916291	1			4	81	0.05	-2.99573	8	8							1
Shapira	Pediatr Dent	1990	12	168	1			1																				1					1
Shapira	Pediatr Dent	1990	12	168	1	1		1	SM		1	60	47	90	1	0.52	-0.653926	1			4	90	0.04	-3.21888	13	13							1
Simonsen	J Am Dent Assoc	1981	102	323	1		1																				1						1
Simonsen	J Am Dent Assoc	1987	115	31	1			1	RCO		1	60	38	211		0.18	-1.7148		1		14	211	0.07	-2.65926	2.57143	2.57							1
Simonsen	J Am Dent Assoc	1987	115	31	1	1		1	RCO		1	120	100	231		0.43	-0.84397		1		36	231	0.16	-1.83258	2.6875	2.69							1
Simonsen	J Am Dent Assoc	1991	122	34	1		1	1	SM																						1		1
Smales	Am J Dent	1999	12	59	1		1																				1						1
Songpaisan	Community Dent Oral Epidemiol	1995	23	25	1		1																					1					1
Stephen	J Dent	1981	9	53	1																							1					1
Stephen	J Dent	1981	9	53	1		1																					1					1
Stephen	Brit Dent J	1982	153	232	1			1	SM		1	24	5	58	1	0.09	-2.40795	1			1	58	0.02	-3.91202	4.5	4.5							1
Stephen	Brit Dent J	1982	153	232	1	1		2	SM		1	24	0.5	59		0.008	-2.52573	1			0.5	59	0.008	-4.82831	1	1							1
Stephen	Brit Dent J	1985	159	404	1			1	SM		1	24	6	50		0.12	-2.12026	1			0.5	50	0.01	-4.60517	12	12							1
Stephen	Brit Dent J	1985	159	404	1	1		1	SM		1	24	5	58		0.09	-2.40795	1			1	58	0.02	-3.91202	4.5	4.5							1
Sveen	Clin Prev Dent	1986	8	9	1																							1					1
Sveen	Clin Prev Dent	1986	8	9	1		1																					1					1
Thsylstrup	Scand J Dent Res	1978	86	21	1	1		1	SM		1	24	183	452	1	0.41	-0.891598	1			63	452	0.14	-1.96611	2.92857	2.93							1
Trummler	Schweiz Monatsschr Zahnmed	1990	100	61	1																								1				1
Trummler	Schweiz Monatsschr Zahnmed	1990	100	61	1																								1				1
Trummler	Schweiz Monatsschr Zahnmed	1990	100	61	1																								1				1
Trummler	Schweiz Monatsschr Zahnmed	1990	100	61	1		1																						1				1
Ulusu	Eur Arch Paediatr Dent	2012	13	94	4		1	2	SM	1																					1		1
Vrbic	Quintessence Int	1983	4	421	1	1		1	SM		1	24	67	373		0.18	-1.7148	1			41	373	0.11	-2.20727	1.63636	1.64							1
Vrbic	Quintessence Int	1986	17	371	1			2	SM		1	60	141	293		0.48	-0.733969	1			108	293	0.37	-0.994252	1.2973	1.3							1
Vrbic	Quintessence Int	1986	17	371	1			2	SM		1	24	31	293		0.11	-2.20727	1			29	293	0.1	-2.30259	1.1	1.1							1
Vrbic	Quintessence Int	1986	17	371	1			2	SM		1	36	97	293		0.33	-1.10866	1			56	293	0.19	-1.66073	1.73684	1.74							1
Vrbic	Quintessence Int	1986	17	371	1	1		2	SM		1	48	114	293		0.39	-0.941609	1			79	293	0.27	-1.30933	1.44444	1.44							1
Vrbic	Quintessence Int	1999	30	825	1																							1					1
Vrbic	Quintessence Int	1999	30	825	1		1																					1					1
Wendt	Swed Dent J	1988	12	181	1		1																						1				1
Wendt	Swed Dent J	2001	25	61	1																								1				1
Wendt	Swed Dent J	2001	25	61	1		1																						1				1
Williams	Brit Dent J	1976	141	15	1			1	SM	1	1	24	56	100	1	0.56	-0.579818	1			10	100	0.1	-2.30259	5.6	5.6							1
Williams	Brit Dent J	1976	141	15	1	1		1	SM	1	1	24	221	581	1	0.38	-0.967584	1			47	581	0.08	-2.52573	4.75	4.75							1
Williams	Brit Dent J	1981	150	183	1			2	SM	1	1	48	49	137		0.36	-1.02165	1			34	137	0.25	-1.38629	0.144	1.44							1
Williams	Brit Dent J	1981	150	183	1			2	SM	1	1	48	118	137		0.86	-0.150823	1			71	137	0.52	-0.653926	1.65385	1.65							1
Williams	Brit Dent J	1981	150	183	1	1		2	SM	1	1	48	112	126		0.89	-0.116534	1			66	126	0.52	-0.653926	1.71154	1.71							1
Williams	Brit Dent J	1986	161	367	1			1	SM		1	24	75	86		0.87	-0.139262	1			20	86	0.23	-1.46968	3.78261	3.78							1
Williams	Brit Dent J	1986	161	367	1			1	SM		1	24	48	60		0.8	-0.223144	1			20	60	0.33	-1.10866	2.42424	2.42							1
Williams	Brit Dent J	1986	161	367	1			1	SM		1	24	14	60		0.23	-1.46968	1			4	60	0.07	-2.65926	3.28571	3.29							1
Williams	Brit Dent J	1986	161	367	1	1		1	SM		1	24	17	86		0.2	-1.60944	1			4	86	0.05	-2.99573	4	4							1
Williams	Brit Dent J	1996	180	104	1			1	SM	1	1	24	62	295		0.21	-1.56065			1	4	295	0.01	-4.60517	21	21							1
Williams	Brit Dent J	1996	180	104	1	1		1	SM	1	1	36	86	222		0.39	-0.941609			1	16	222	0.07	-2.65926	5.57143	5.57							1
Yakut	J Clin Pediatr Dent	2006	30	215	1		1																					1					1
Yildiz	J Oral Rehabil	2004	31	979	1			1	SM		1	24	30	61		0.49	-0.71335	1			0.5	61	0.008	-4.82831	61.25	61.25							1
Yildiz	J Oral Rehabil	2004	31	979	1	1		1	SM		1	24	36	61		0.59	-0.527633	1			7	61	0.12	-2.12026	4.91667	4.92							1
Yilmaz	Eur Arch Paediatr Dent	2010	11	88	1			1	SM		1	24	44	62		0.71	-0.34249	1			7	62	0.11	-2.20727	6.45455	6.45							1
Yilmaz	Eur Arch Paediatr Dent	2010	11	88	1	1		1	SM		1	24	48	62		0.77	-0.261365	1			10	62	0.16	-1.83258	4.8125	4.81							1
						57	38
Abid	Eastern Mediterr Health J	2002	8	315	1	1		1	SM		2	24	27	47		0.57	-0.562119	1			5	47	0.11	-2.20727	5.18182	5.18							1
Amin	J Dent Hyg	2008	82	45	1	see above		1	RCT	1	2	24	18	24		0.75	-0.287682	1			1	24	0.04	-3.21888	18.75	18.75							1
Antonson	J Am Dent Assoc	2012	143	115	4		see above	2	SM	1																					1		1
Arrow	Community Dent Oral Epidemiol	1995	23	282	1	see above		1	SM	1	2	48	323	405		0.8	-0.223144	1			6	405	0.02	-3.91202	40	40							1
Barja-Fidalgo	J Dent Child	2009	76	34	1	see above		1	RCT	1	2	60	15	21		0.71	-0.34249		1		2	21	0.1	-2.30259	7.1	7.1							1
Baseggio	Oral Health Prev Dent	2010	8	261	1			1	SM	1	2	24	584	640		0.91	-0.0943107	1			57	640	0.09	-2.40795	10.1111	10.11							1
Baseggio	Oral Health Prev Dent	2010	8	261	1			1	SM	1	2	36	596	628		0.95	-0.0512933	1			126	628	0.2	-1.60944	4.75	4.75							1
Baseggio	Oral Health Prev Dent	2010	8	261	1	see above		2	SM	1	2	30	592	636		0.93	-0.0725707	1			32	636	0.05	-2.99573	18.6	18.6							1
Beiruti	Caries Res	2006	40	52	1		see above	2	RCT	1																					1		1
Dhar	Pediatr Dent	2012	34	46	4	see above		2	SM	1	2	24	25	25		1	0	1			2	25	0.08	-2.52573	12.5	12.5							1
Forss	Community Dent Oral Epidemiol	1994	22	21	1	see above		1	SM	1	2	24	112	151		0.74	-0.301105	1			7	151	0.05	-2.99573	14.8	14.8							1
Forss	Community Dent Oral Epidemiol	1998	26	21	1	see above		1	SM	1	2	84	87	97		0.9	-0.105361	1			23	97	0.24	-1.42712	3.75	3.75							1
Frencken	Caries Res	1998	32	119	1		1																				1						1
Ganesh	J Clin Pediatr Dent	2006	31	52	1		see above																					1					1
Ho	Community Dent Oral Epidemiol	1999	27	195	1																							1					1
Ho	Community Dent Oral Epidemiol	1999	27	195	1		1																					1					1
Holmgren	Community Dent Oral Epidemiol	2000	28	314	1		1																				1						1
Karlzen-Reuterving	J Dent Child	1995	62	108	1		see above																					1					1
Karlzen-Reuterving	J Dent Child	1995	62	108	1	see above		1	SM	1	2	36	52	72		0.72	-0.328504	1			1	72	0.01	-4.60517	72	72							1
Kervanto-Seppälä	Int J Paediatr Dent	2008	18	56	1		see above	1	SM	1																					1		1
Kilpatrick	J Dent	1996	24	399	3		see above																				1						1
Komatsu	J Am Dent Assoc	1994	125	543	1			1	LS		2	24	44	152		0.29	-1.23787	1			62	152	0.12	-2.12026	2.41667	2.42							1
Komatsu	J Am Dent Assoc	1994	125	543	1	1		1	LS		2	36	30	101		0.3	-1.20397	1			50	101	0.16	-1.83258	1.875	1.88							1
Mejare	Scand J Dent Res	1990	98	345	2		see above																				1						1
Mills	Oper Dent	1993	18	148	1	see above		1	SM	1	2	24	10	59		0.17	-1.77196	1			0.5	59	0.008	-4.82831	21.25	21.25							1
Mladenovic	SciJFacMedNis	2010	27	115	4	see above		2	SM	1	2	24	3	36		0.083	-2.52573	1			0.5	36	0.01	-4.60517	8	8							1
Oba	J Formosa Med Assoc	2009	108	844	1	see above		1	SM	1	2	36	45	56		0.8	-0.223144	1			6	56	0.11	-2.20727	7.27273	7.27							1
Pardi	Community Dent Oral Epidemiol	2003	31	386	1			1	SM		2	24	164	170		0.96	-0.040822		1		24	170	0.14	-1.96611	6.85714	6.86							1
Pardi	Community Dent Oral Epidemiol	2003	31	386	1			1	SM		2	36	165	172		0.96	-0.040822		1		27	172	0.16	-1.83258	6	6							1
Pardi	Community Dent Oral Epidemiol	2003	31	386	1			1	SM		2	60	126	128		0.98	-0.0202027		1		26	128	0.2	-1.60944	4.9	4.9							1
Pardi	Community Dent Oral Epidemiol	2003	31	386	1			1	SM		2	24	146	170		0.86	-0.150823		1		17	170	0.1	-2.30259	8.6	8.6							1
Pardi	Community Dent Oral Epidemiol	2003	31	386	1			1	SM		2	36	150	172		0.87	-0.139262		1		20	172	0.12	-2.12026	7.25	7.25							1
Pardi	Community Dent Oral Epidemiol	2003	31	386	1	1		1	SM		2	60	126	128		0.98	-0.0202027		1		29	128	0.23	-1.46968	4.26087	4.26							1
Pardi	J Clin Pediatr Dent	2005	29	133	1		see above	1	RCT	1																					1		1
Pereira	Am J Dent	2003	16	23	1			2	RCT		2	24	164	170		0.96	-0.040822		1		24	170	0.14	-1.96611	6.85714	6.86							1
Pereira	Am J Dent	2003	16	23	1			2	RCT		2	36	165	172		0.96	-0.040822		1		27	172	0.16	-1.83258	6	6							1
Pereira	Am J Dent	2003	16	23	1			2	RCT		2	24	146	170		0.86	-0.150823		1		17	170	0.1	-2.30259	8.6	8.6							1
Pereira	Am J Dent	2003	16	23	1	1		2	RCT		2	36	150	172		0.87	-0.139262		1		20	172	0.12	-2.12026	7.25	7.25							1
Poulsen	Community Dent Oral Epidemiol	2001	29	298	1																							1					1
Poulsen	Community Dent Oral Epidemiol	2001	29	298	1	see above		1	SM	1	2	36	112	116		0.97	-0.0304592	1			44	116	0.38	-0.967584	2.55263	2.55							1
Poulsen	Community Dent Oral Epidemiol	2006	34	36	1	see above		1	SM	1	2	29	341	364	1	0.94	-0.0618754	1			42	364	0.12	-2.12026	7.83333	7.83							1
Raadal	Int J Paediatr Dent	1996	6	235	1			1	SM	1	2	24	125	133	1	0.94	-0.0618754	1			5	133	0.04	-3.21888	23.5	23.5							1
Raadal	Int J Paediatr Dent	1996	6	235	1	see above		1	SM	1	2	36	126	133	1	0.95	-0.0512933	1			10	133	0.08	-2.52573	11.875	11.88							1
Rock	J Dent	1996	24	275	1			1	SM	1																					1		1
Rock	J Dent	1996	24	275	1		see above	1	SM	1																					1		1
Songpaisan	Community Dent Oral Epidemiol	1995	23	25	1																							1					1
Songpaisan	Community Dent Oral Epidemiol	1995	23	25	1		see above																					1					1
Smales	Am J Dent	1999	12	59	1		see above																				1						1
Taifour	Community Dent Oral Epidemiol	2003	31	314	1	1		1	SM		2	60	94	95		0.99	-0.0100503	1			15	95	0.16	-1.83258	6.1875	6.19							1
Ulusu	Eur Arch Paediatr Dent	2012	13	94	4		see above	2	SM	1																					1		1
Williams	Brit Dent J	1976	141	15	1	see above		1	SM	1	2	24	131	166	1	0.79	-0.235722	1			19	166	0.11	-2.20727	7.18182	7.18							1
Williams	Brit Dent J	1981	150	183	1	see above		2	SM	1	2	48	87	126		0.69	-0.371064	1			38	126	0.3	-1.20397	2.3	2.3							1
Williams	Brit Dent J	1996	180	104	1			1	SM	1	2	24	283	295		0.96	-0.040822			1	19	295	0.06	-2.81341	16	16							1
Williams	Brit Dent J	1996	180	104	1	see above		1	SM	1	2	36	213	222		0.96	-0.040822			1	22	222	0.1	-2.30259	16	16							1
						62	41											113	33	4							15	35	21	3	16	90	240
Table legend																																Total DS	Total
Material type																																excluded	DS
1	Resin
2	Glass-ionomer cement
Reason for data exclusion
1	Exclusive investigation of molar teeth not made explicit
2	Caries assessment missing
3	Full article could not be traced
4	No computable data reported
5	Not all teeth evaluated for retention loss were evalauted for caries occurance
Data source
1	Extracted from: Kühnisch J, Mansmann U, Heinrich-Weltzien R, Hickel R: Longevity of materials for pit and fissure sealing-results from a meta-analysis. Dent Mater 2012, 28:298-303.
2	Extracted from: Mickenautsch S, Yengopal V: Caries-preventive effect of glass ionomer and resin-based fissure sealants on permanent teeth: An update of systematic review evidence. BMC Res Notes 2011, 4:22.
3	Extracted from: Yengopal V, Mickenautsch S: Resin-modified glass-ionomer cements versus resin-based materials as fissure sealants - a meta-analysis of clinical trials. Eur Arch Paediatr Dent 2010, 11:18-25.
4	Further own literature search and/or data calculation
Data calculation
1	Retention data extracted from: Kühnisch J, Mansmann U, Heinrich-Weltzien R, Hickel R: Longevity of materials for pit and fissure sealing-results from a meta-analysis. Dent Mater 2012, 28:298-303.
2	Own calculation from trial data
DS Nr.	Datset number
nR	Number of teeth without completely retained fissure sealants
nC	Number of sealed teeth with caries in pits and fissures
N	Number of evaluated sealed teeth
R-R	Risk of loss of total retention
R-C	Risk of caries development in sealed pits and fissures
RCR	R-R/R-C ratio
ln	Natural logarithm
RCT	Randomized controlled trial (parallel group)
CT	Clinical controlled trial
LS	Single-arm longitudinal study
RCO	Retrospective cohort study
Period	Observation time recorded in months
Caries recorded
D	Carious
DF	Carious or filled
DMF	Carious, extracted or filled
R+G	Resin and GIC investigated in same trial
